# Supplementary material for: Reactions of a geminal Sc/P Lewis pair with pyridotetrazole and beyond
Source: Royal Society of Chemistry journal article supplement (doi:10.1039/d4dt02838d), 2024-11-06
Supplement: d4dt02838d1.pdf [file d4dt02838d1.pdf]

*Supporting Information*

Reactions of a Geminal Sc/P Lewis Pair with Pyridotetrazole  
and Beyond

Yiwen Guan, Xian Xu, Xin Xu\*

*Key Laboratory of Organic Synthesis of Jiangsu Province, College of Chemistry,  
Chemical Engineering and Materials Science, Soochow University, Suzhou 215123, P.*

*R. China.*

\*E-mail: [xinxu@suda.edu.cn](mailto:xinxu@suda.edu.cn)

## Preparation of complex 2

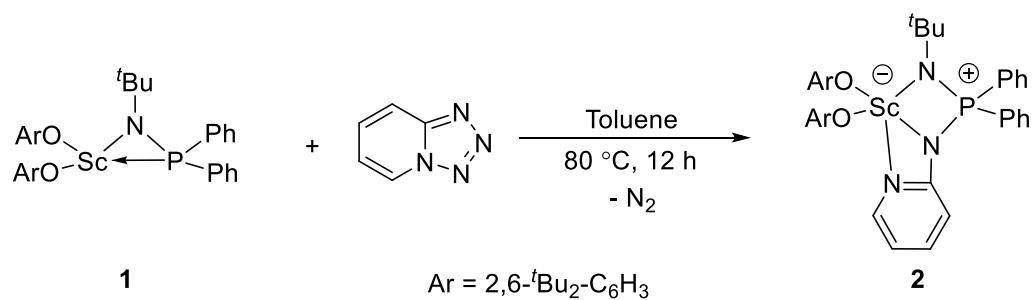

Scheme S1.

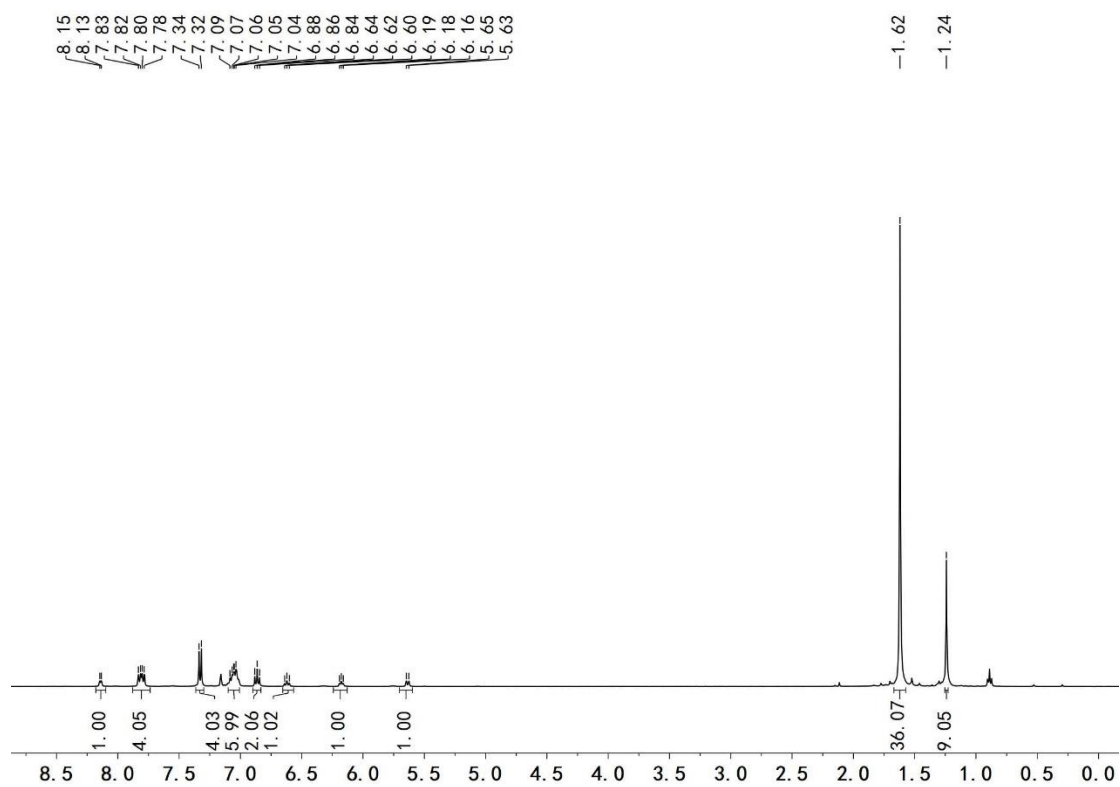

Fig. S1.  $^1\text{H}$  NMR (400 MHz,  $\text{C}_6\text{D}_6$ , 298 K).

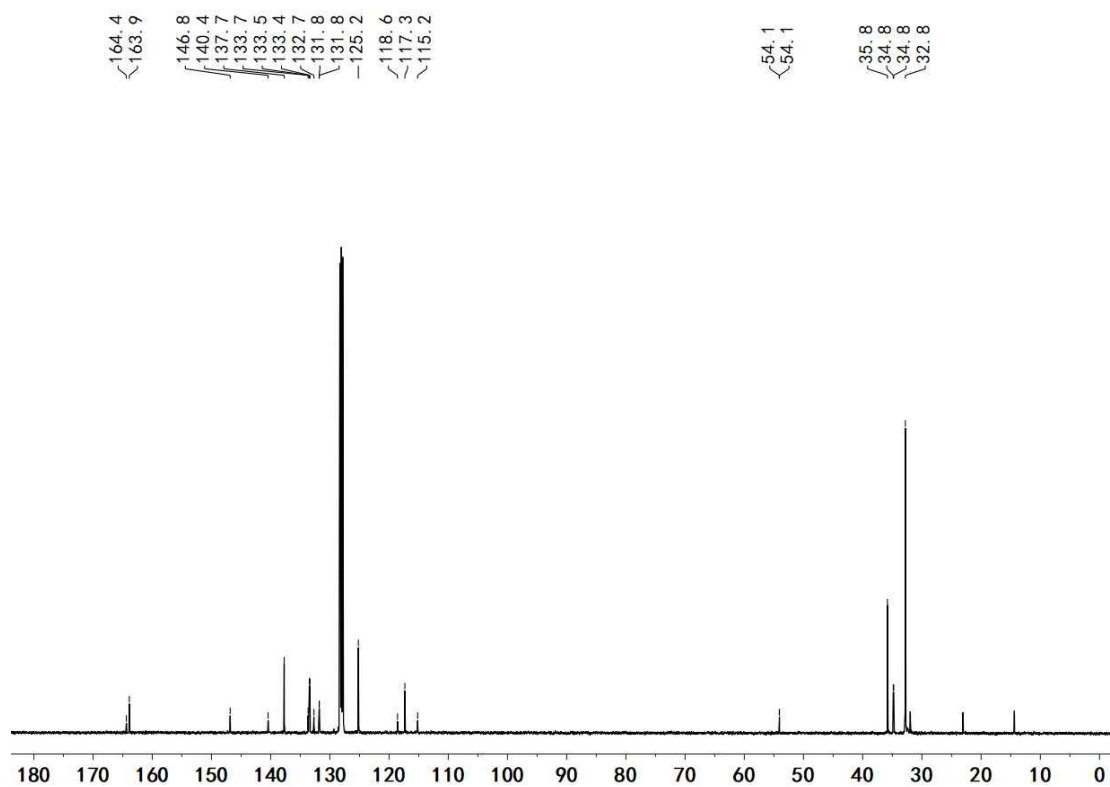

Fig. S2.  $^{13}\text{C}\{^1\text{H}\}$  NMR (101 MHz,  $\text{C}_6\text{D}_6$ , 298 K).

-25.4

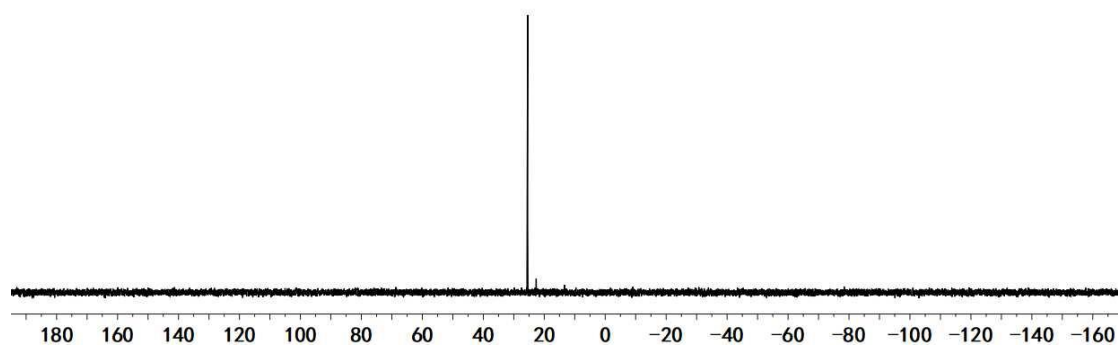

Fig. S3.  $^{31}\text{P}\{^1\text{H}\}$  NMR (162 MHz,  $\text{C}_6\text{D}_6$ , 298 K).

**X-ray crystal structure analysis of complex 2:** formula  $\text{C}_{49}\text{H}_{65}\text{N}_3\text{O}_2\text{PSc}$ ,  $M = 803.97$   $\text{g mol}^{-1}$ , colorless,  $0.08 \times 0.06 \times 0.05$  mm, orthorhombic, space group *Pbca*,  $a =$

22.0487(8),  $b = 18.0563(8)$ ,  $c = 22.8495(9)$  Å,  $\alpha = 90^\circ$ ,  $\beta = 90^\circ$ ,  $\gamma = 90^\circ$ ,  $V = 9096.8(6)$  Å<sup>3</sup>,  $\rho_{calc} = 1.174$  gcm<sup>-3</sup>,  $\mu = 0.237$  mm<sup>-1</sup>, empirical absorption correction ( $0.5132 \leq T \leq 0.7456$ ),  $Z = 8$ ,  $\lambda = 0.71073$  Å,  $T = 273.15$  K, 86418 reflections collected ( $-26 \leq h \leq 26$ ,  $-21 \leq k \leq 21$ ,  $-26 \leq l \leq 27$ ), 8024 independent ( $R_{int} = 0.1527$ ) and 5350 observed reflections [ $I > 2\sigma(I)$ ], 520 refined parameters, the final  $R_I$  was 0.0835 [ $I > 2\sigma(I)$ ] and  $wR_2$  was 0.1483 (all data), max. (min.) residual electron density 0.47 (-0.30) e Å<sup>-3</sup>, hydrogen atoms were placed in calculated positions and refined using a riding model.

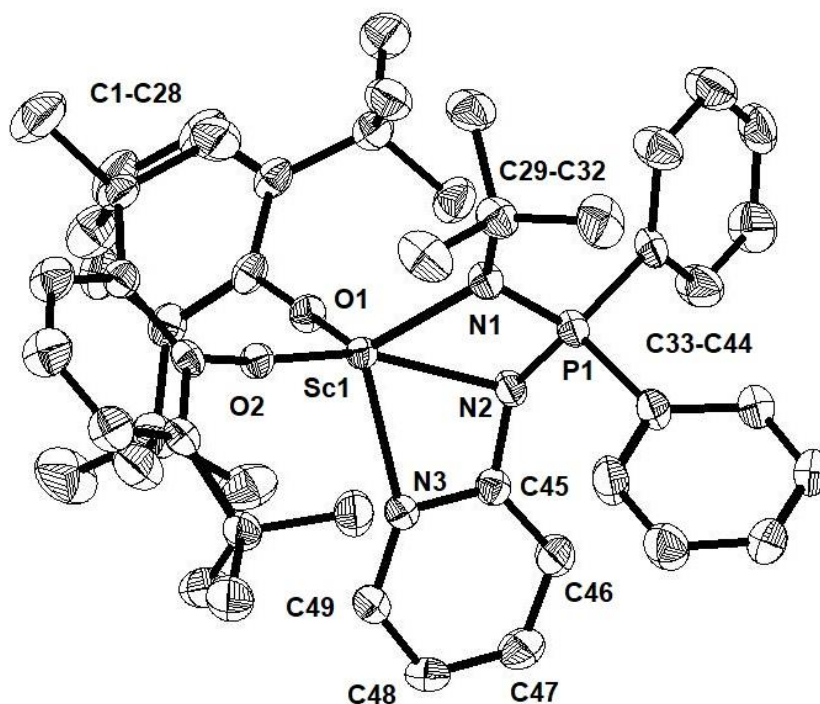

**Fig. S4.** Molecular structure of complex 2.

### Preparation of complex 3

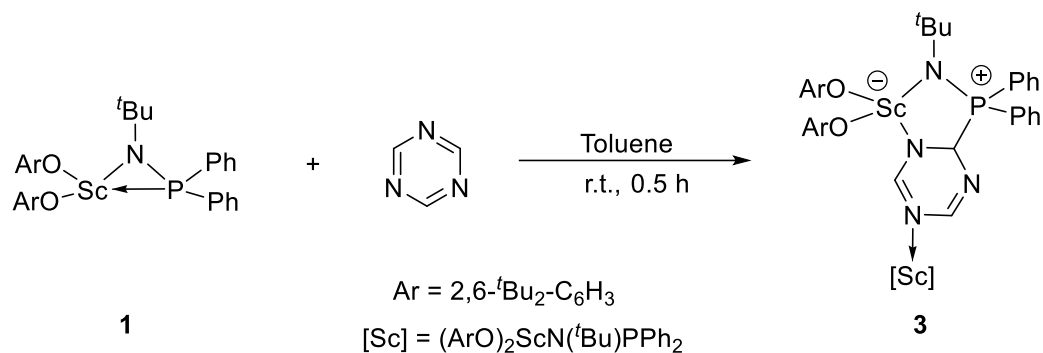

Scheme S2.

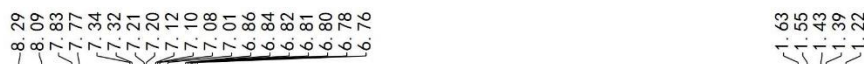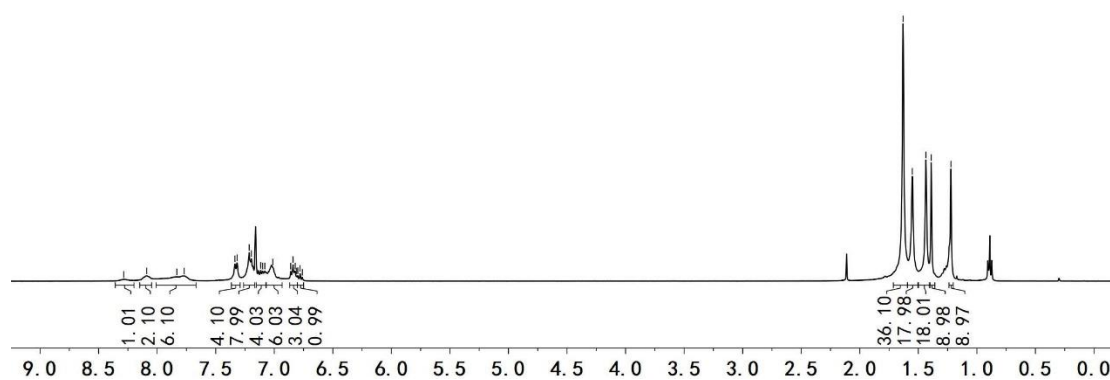

Fig. S5. <sup>1</sup>H NMR (400 MHz, C<sub>6</sub>D<sub>6</sub>, 298 K).

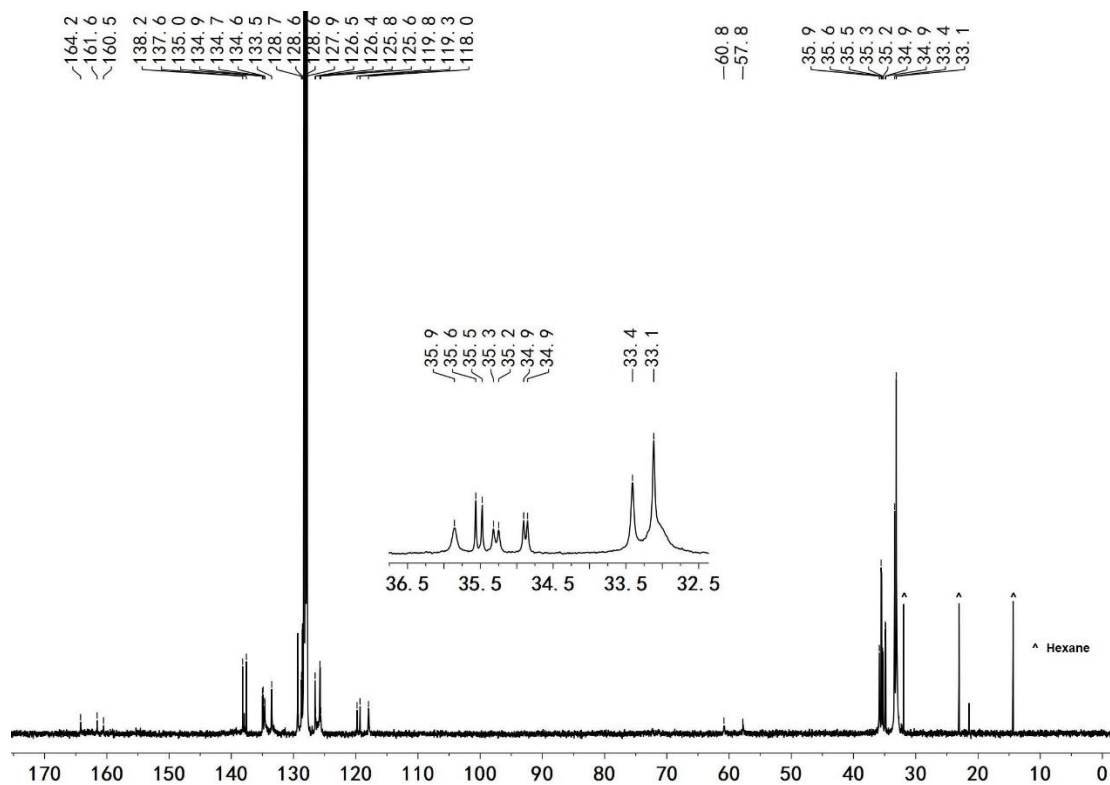

Fig. S6.  $^{13}\text{C}\{^1\text{H}\}$  NMR (101 MHz,  $\text{C}_6\text{D}_6$ , 298 K).

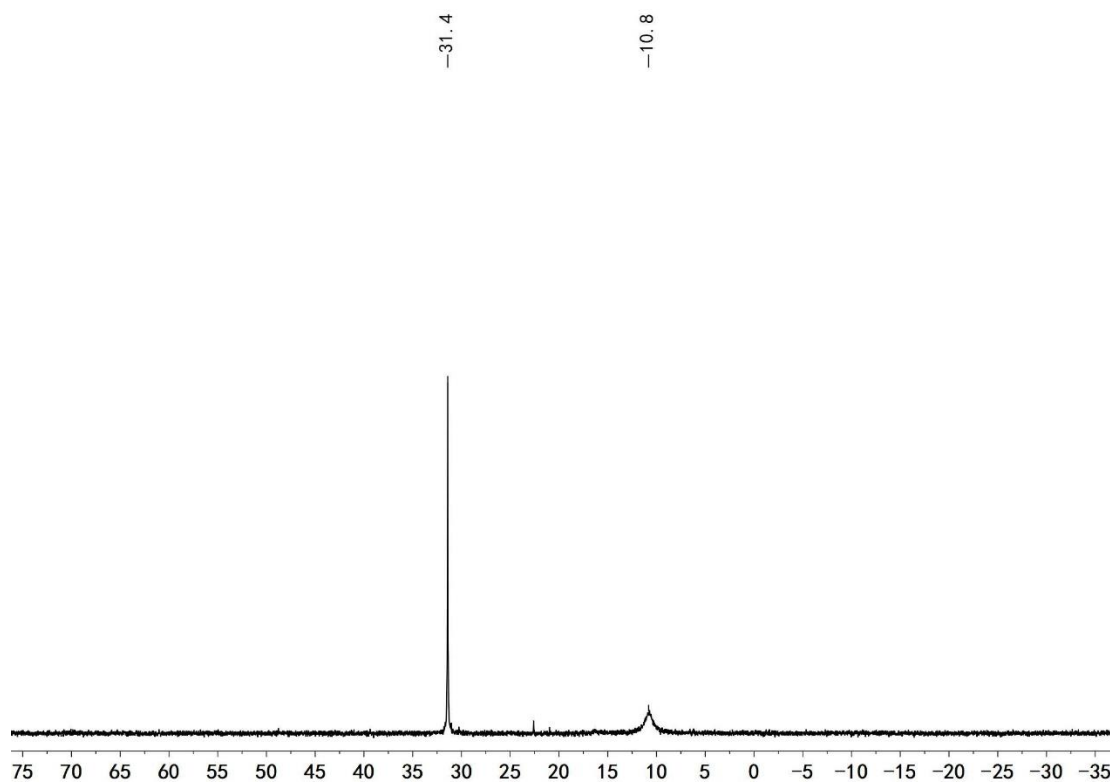

Fig. S7.  $^{31}\text{P}\{^1\text{H}\}$  NMR (162 MHz,  $\text{C}_6\text{D}_6$ , 298 K).

**X-ray crystal structure analysis of complex 3:** formula  $\text{C}_{91}\text{H}_{125}\text{N}_5\text{O}_4\text{P}_2\text{Sc}_2$ ,  $M = 1504.81 \text{ gmol}^{-1}$ , colorless,  $0.1 \times 0.06 \times 0.04 \text{ mm}$ , monoclinic, space group  $P2_1/c$ ,  $a =$

25.380(7),  $b = 12.984(3)$ ,  $c = 29.626(7)$  Å,  $\alpha = 90^\circ$ ,  $\beta = 113.566(9)^\circ$ ,  $\gamma = 90^\circ$ ,  $V = 8949(4)$  Å<sup>3</sup>,  $\rho_{calc} = 1.117$  gcm<sup>-3</sup>,  $\mu = 1.345$  mm<sup>-1</sup>, empirical absorption correction ( $0.4742 \leq T \leq 0.7518$ ),  $Z = 4$ ,  $\lambda = 1.34139$  Å,  $T = 150.15$  K, 115653 reflections collected ( $-30 \leq h \leq 30$ ,  $-15 \leq k \leq 13$ ,  $-35 \leq l \leq 35$ ), 15791 independent ( $R_{int} = 0.1543$ ) and 11936 observed reflections [ $I > 2\sigma(I)$ ], 969 refined parameters, the final  $R_I$  was 0.0786 [ $I > 2\sigma(I)$ ] and  $wR_2$  was 0.2258 (all data), max. (min.) residual electron density 0.65 (-0.78) e Å<sup>-3</sup>, hydrogen atoms were placed in calculated positions and refined using a riding model.

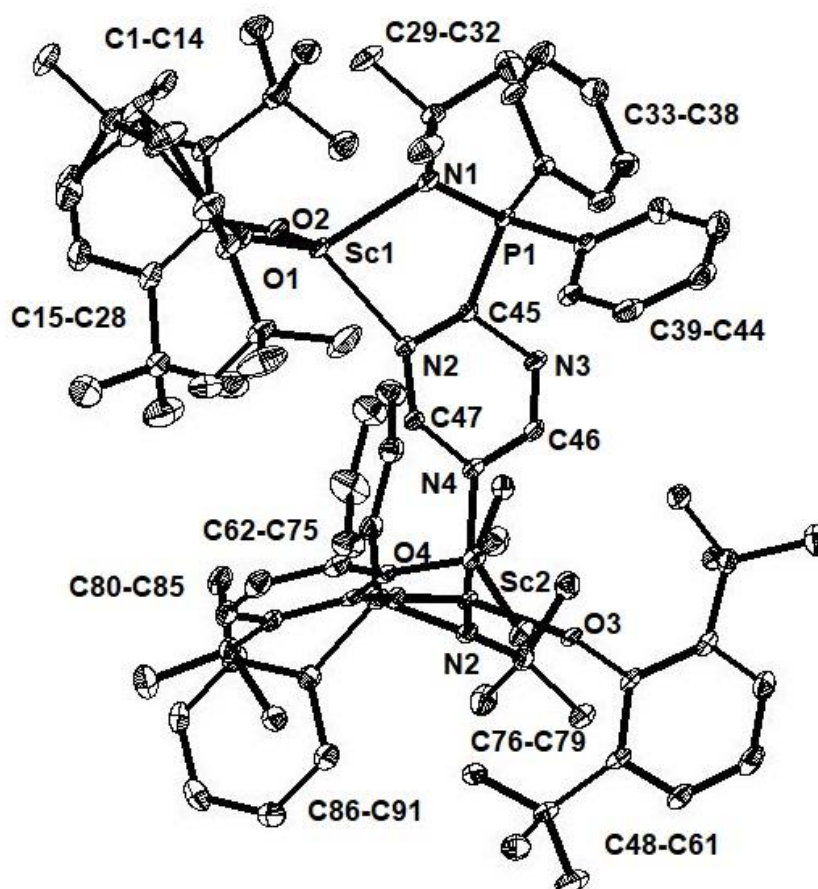

Fig. S8. Molecular structure of complex 3.

## Preparation of complex 4

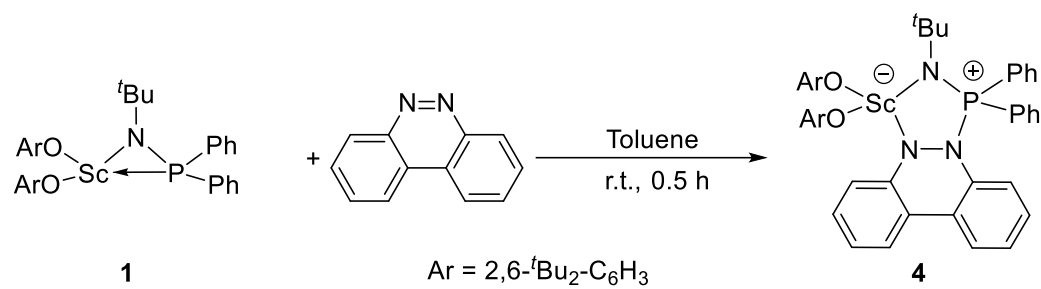

Scheme S3.

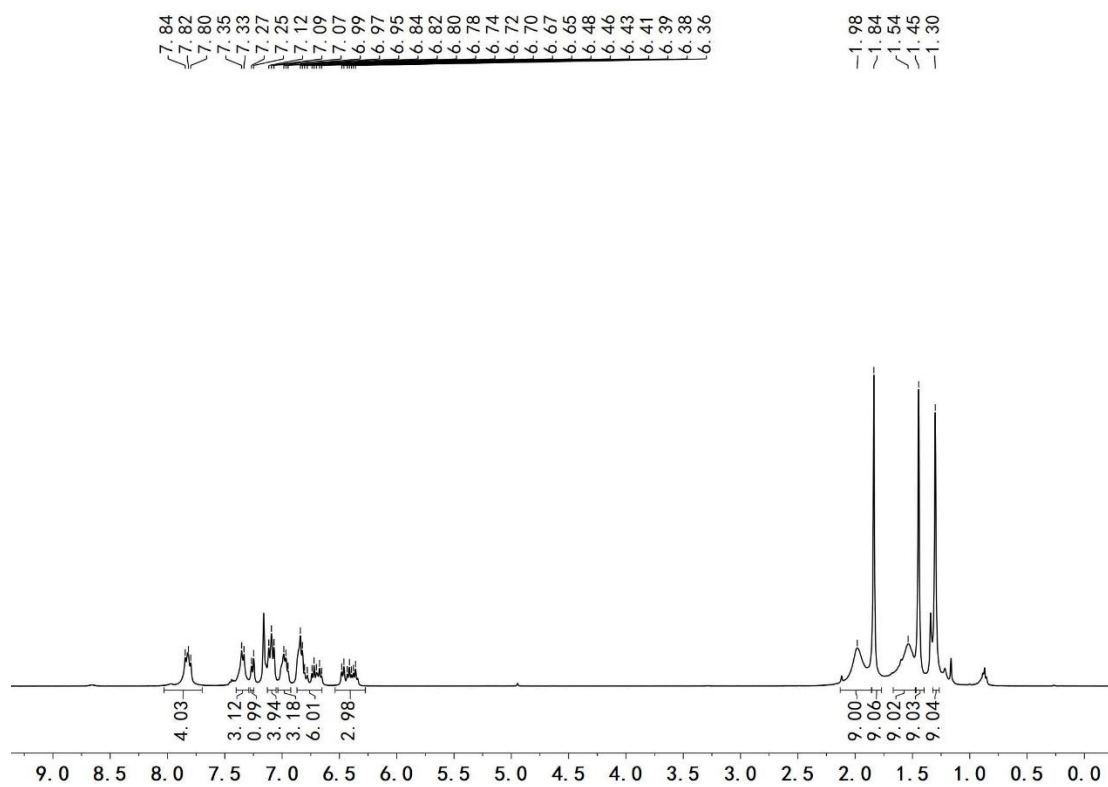

Fig. S9.  $^1\text{H}$  NMR (400 MHz,  $\text{C}_6\text{D}_6/\text{Bromobenzene-}d_5 = 5:1$ , 298 K).



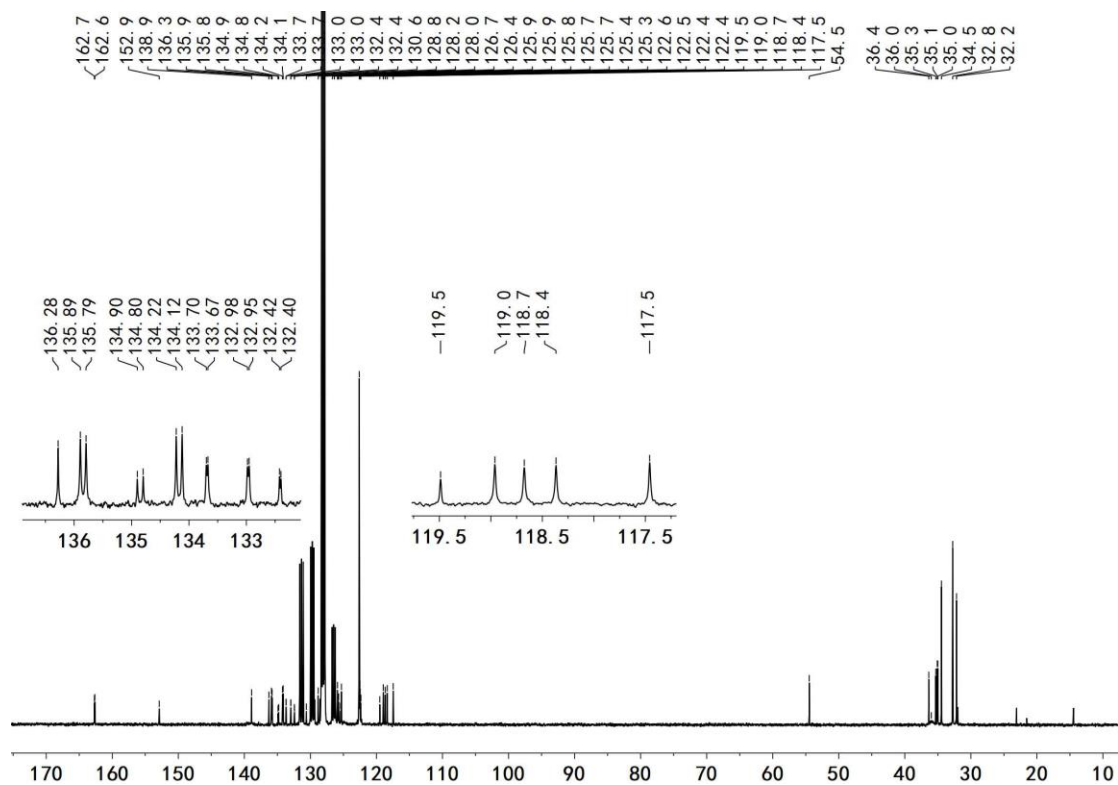

Fig. S10.  $^{13}\text{C}\{^1\text{H}\}$  NMR (101 MHz,  $\text{C}_6\text{D}_6/\text{Bromobenzene-}d_5 = 5:1$ , 298 K).

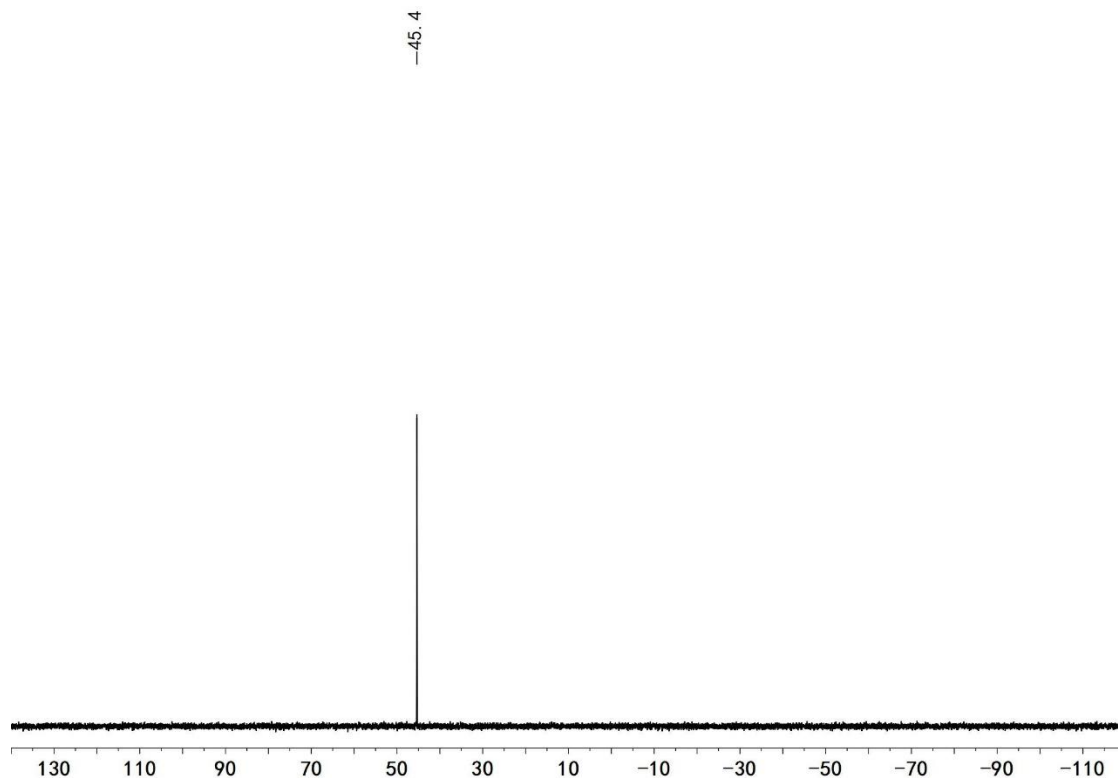

Fig. S11.  $^{31}\text{P}\{^1\text{H}\}$  NMR (162 MHz,  $\text{C}_6\text{D}_6/\text{Bromobenzene-}d_5 = 5:1$ , 298 K).

**X-ray crystal structure analysis of complex 4:** formula  $\text{C}_{56}\text{H}_{69}\text{N}_3\text{O}_2\text{PSc}$ ,  $M = 892.07$   $\text{g mol}^{-1}$ , colorless,  $0.16 \times 0.14 \times 0.13$  mm, monoclinic, space group  $P2_1/n$ ,  $a =$

11.2105(4),  $b = 23.0554(9)$ ,  $c = 19.3556(7)$  Å,  $\alpha = 90^\circ$ ,  $\beta = 97.0520(10)^\circ$ ,  $\gamma = 90^\circ$ ,  $V = 4964.9(3)$  Å<sup>3</sup>,  $\rho_{calc} = 1.193$  gcm<sup>-3</sup>,  $\mu = 0.224$  mm<sup>-1</sup>, empirical absorption correction ( $0.4657 \leq T \leq 0.7456$ ),  $Z = 4$ ,  $\lambda = 0.71073$  Å,  $T = 119.99$  K, 83669 reflections collected ( $-14 \leq h \leq 14$ ,  $-29 \leq k \leq 29$ ,  $-25 \leq l \leq 25$ ), 11378 independent ( $R_{int} = 0.1215$ ) and 7350 observed reflections [ $I > 2\sigma(I)$ ], 583 refined parameters, the final  $R_1$  was 0.0497 [ $I > 2\sigma(I)$ ] and  $wR_2$  was 0.1405 (all data), max. (min.) residual electron density 0.37 (-0.51) e Å<sup>-3</sup>, hydrogen atoms were placed in calculated positions and refined using a riding model.

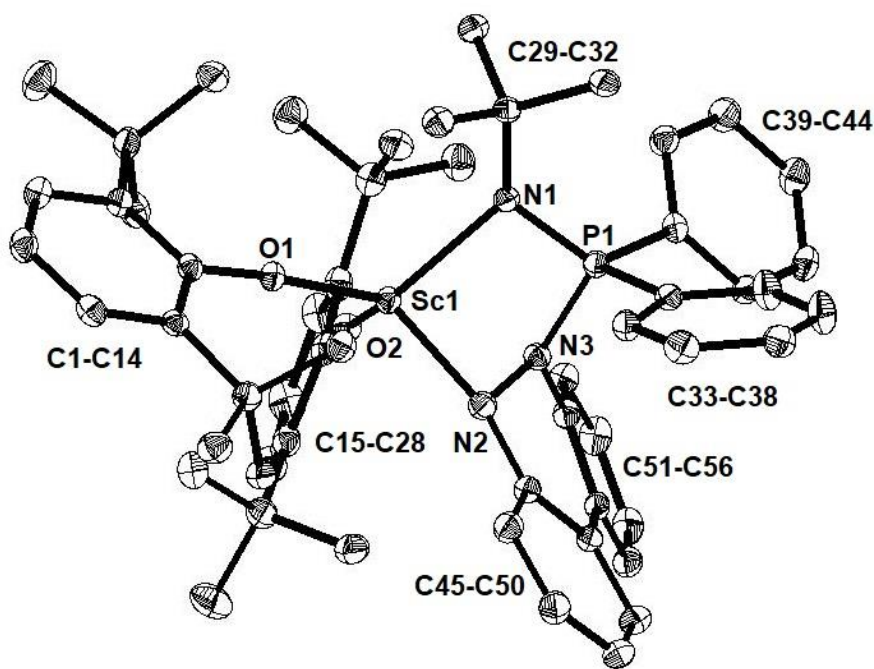

**Fig. S12.** Molecular structure of complex 4.

### Preparation of complex 5

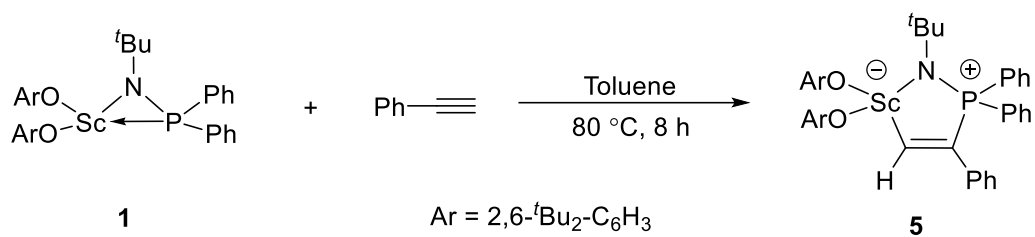

Scheme S4.

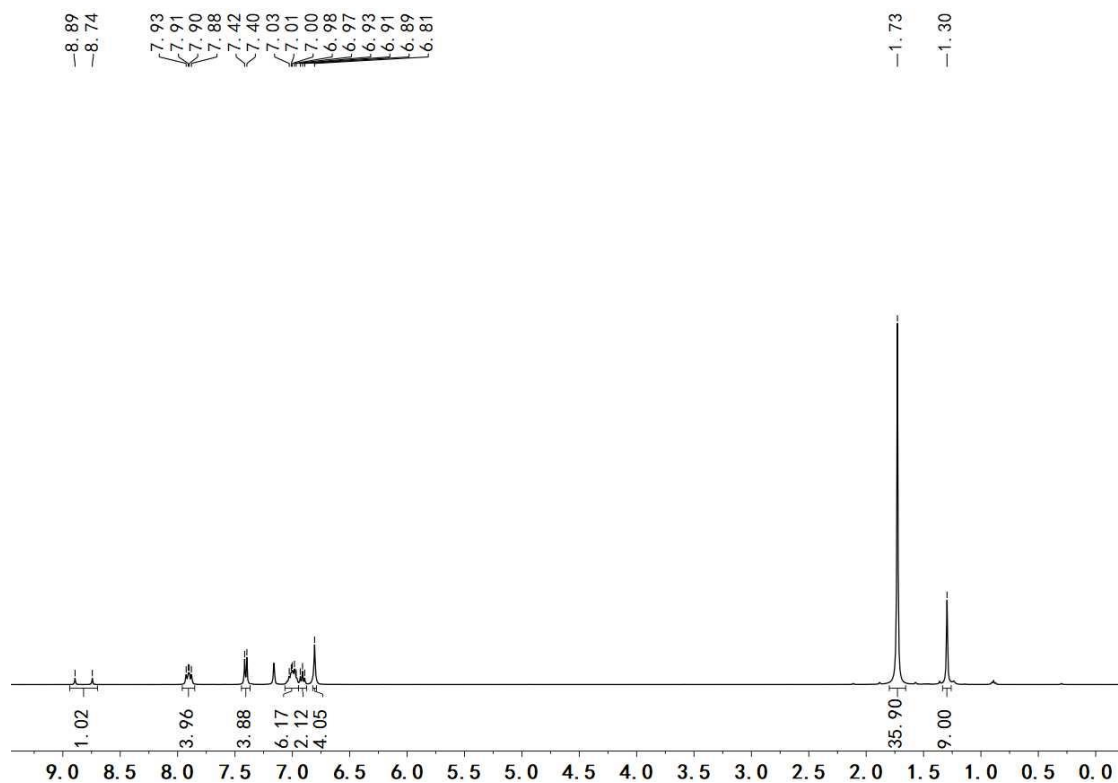

Fig. S13.  $^1\text{H}$  NMR (400 MHz,  $\text{C}_6\text{D}_6$ , 298 K).

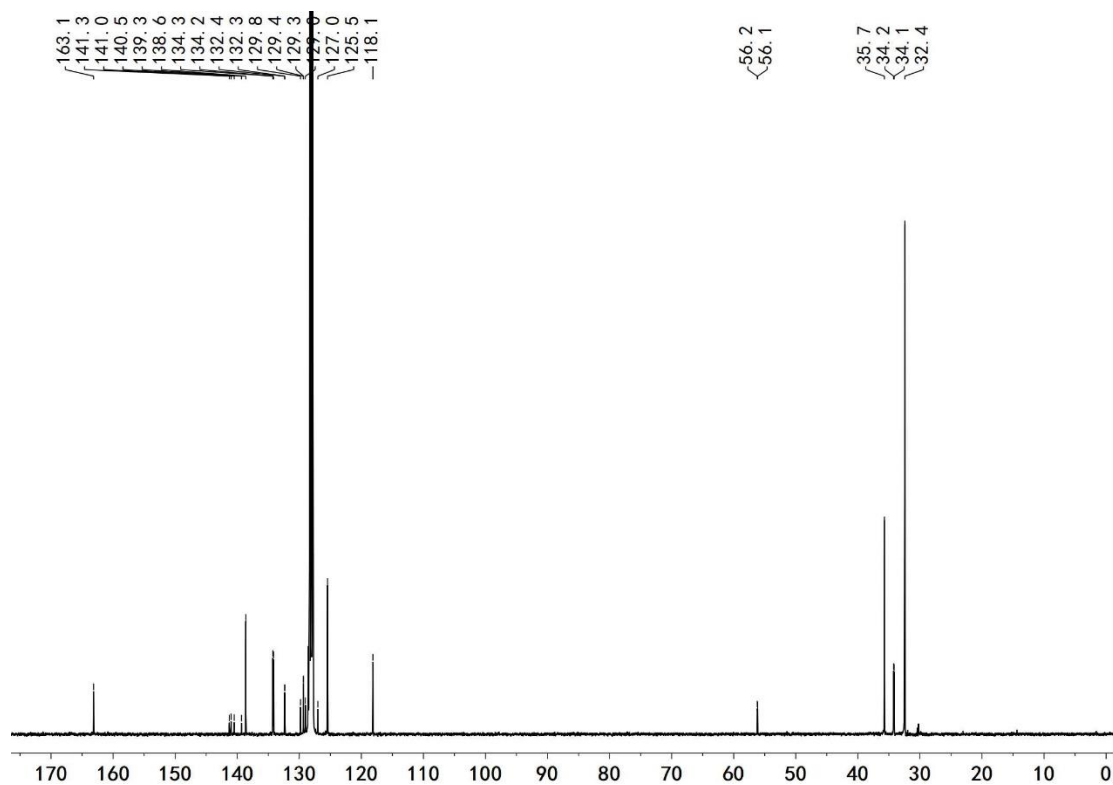

Fig. S14.  $^{13}\text{C}\{^1\text{H}\}$  NMR (101 MHz,  $\text{C}_6\text{D}_6$ , 298 K).

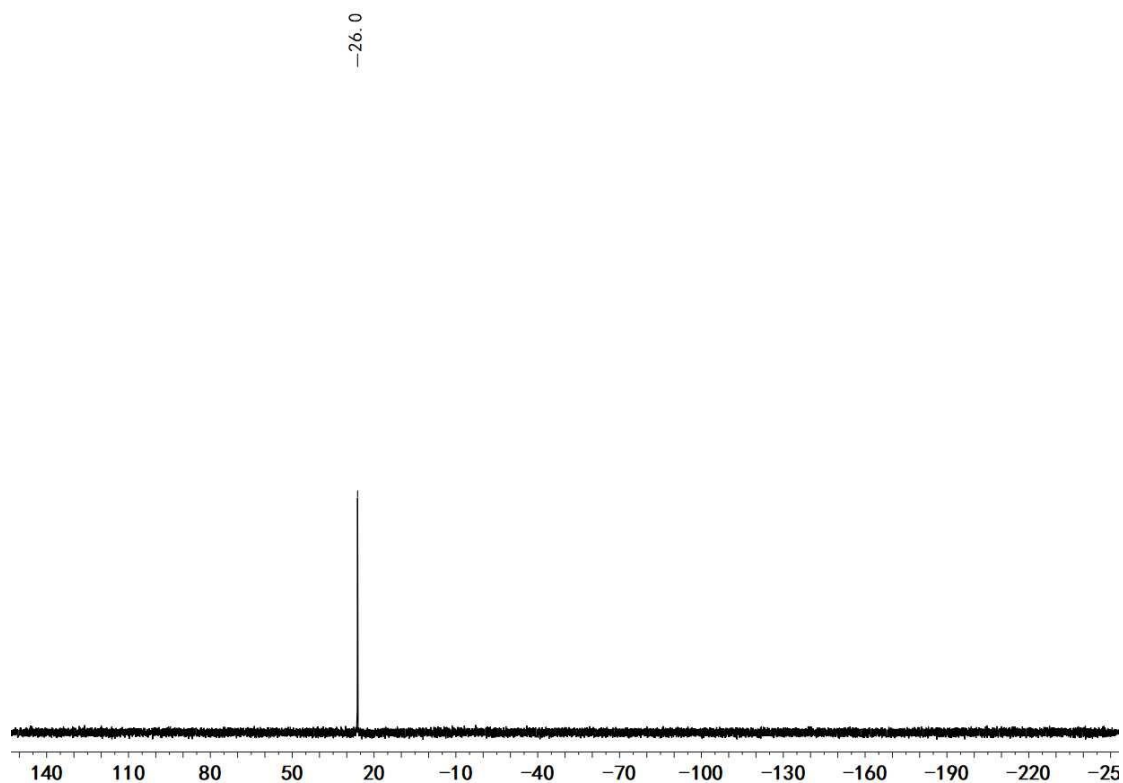

Fig. S15.  $^{31}\text{P}\{^1\text{H}\}$  NMR (162 MHz,  $\text{C}_6\text{D}_6$ , 298 K).

**X-ray crystal structure analysis of complex 5:** formula  $\text{C}_{52}\text{H}_{67}\text{NO}_2\text{PSc}$ ,  $M = 813.99$   $\text{g mol}^{-1}$ , colorless,  $0.20 \times 0.17 \times 0.15$  mm, monoclinic, space group  $C2/c$ ,  $a = 41.923(3)$ ,

$b = 10.2466(5)$ ,  $c = 22.4660(12)$  Å,  $\alpha = 90^\circ$ ,  $\beta = 98.649(5)^\circ$ ,  $\gamma = 90^\circ$ ,  $V = 9541.0(9)$  Å<sup>3</sup>,  $\rho_{calc} = 1.133$  gcm<sup>-3</sup>,  $\mu = 1.279$  mm<sup>-1</sup>,  $Z = 8$ ,  $\lambda = 1.34138$  Å,  $T = 120.0$  K, 60208 reflections collected ( $-49 \leq h \leq 50$ ,  $-12 \leq k \leq 12$ ,  $-27 \leq l \leq 27$ ), 8780 independent ( $R_{int} = 0.1128$ ) and 5507 observed reflections [ $I > 2\sigma(I)$ ], 533 refined parameters, the final  $R_I$  was 0.0569 [ $I > 2\sigma(I)$ ] and  $wR_2$  was 0.1493 (all data), max. (min.) residual electron density 0.32 (-0.46) e Å<sup>-3</sup>, hydrogen atoms were placed in calculated positions and refined using a riding model.

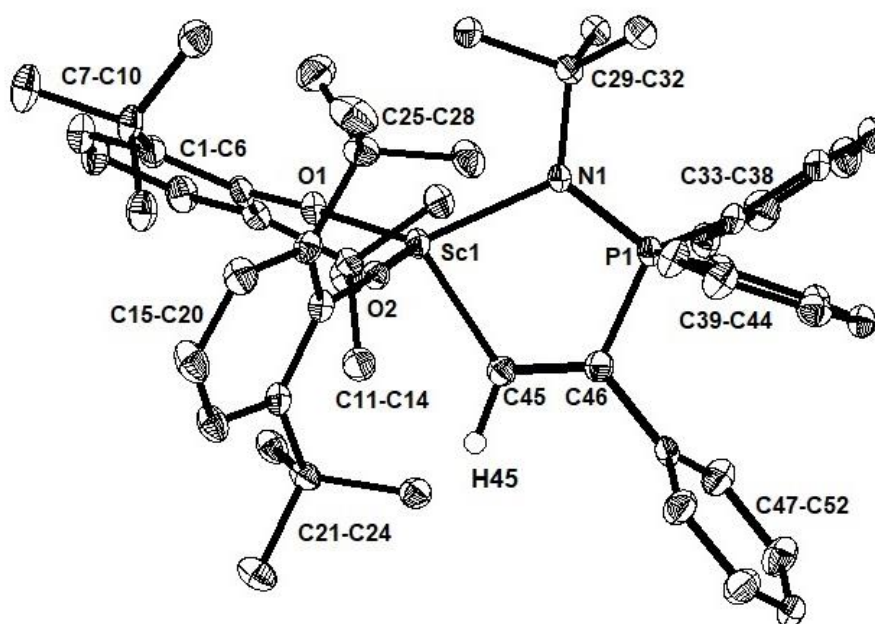

**Fig. S16.** Molecular structure of complex 5.

## Preparation of complex 6

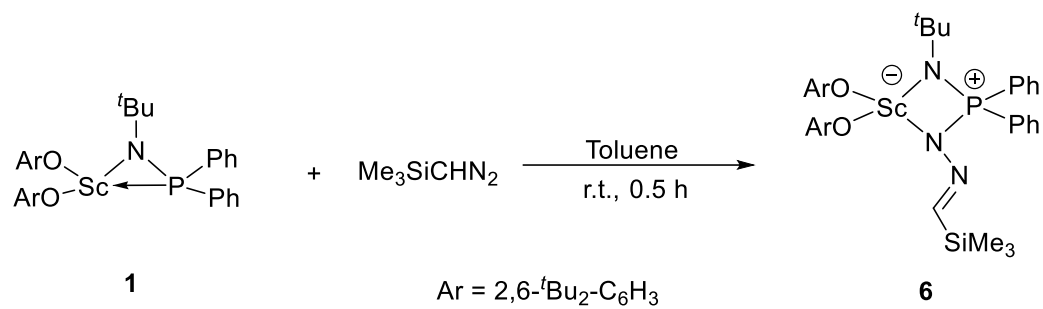

Scheme S5.

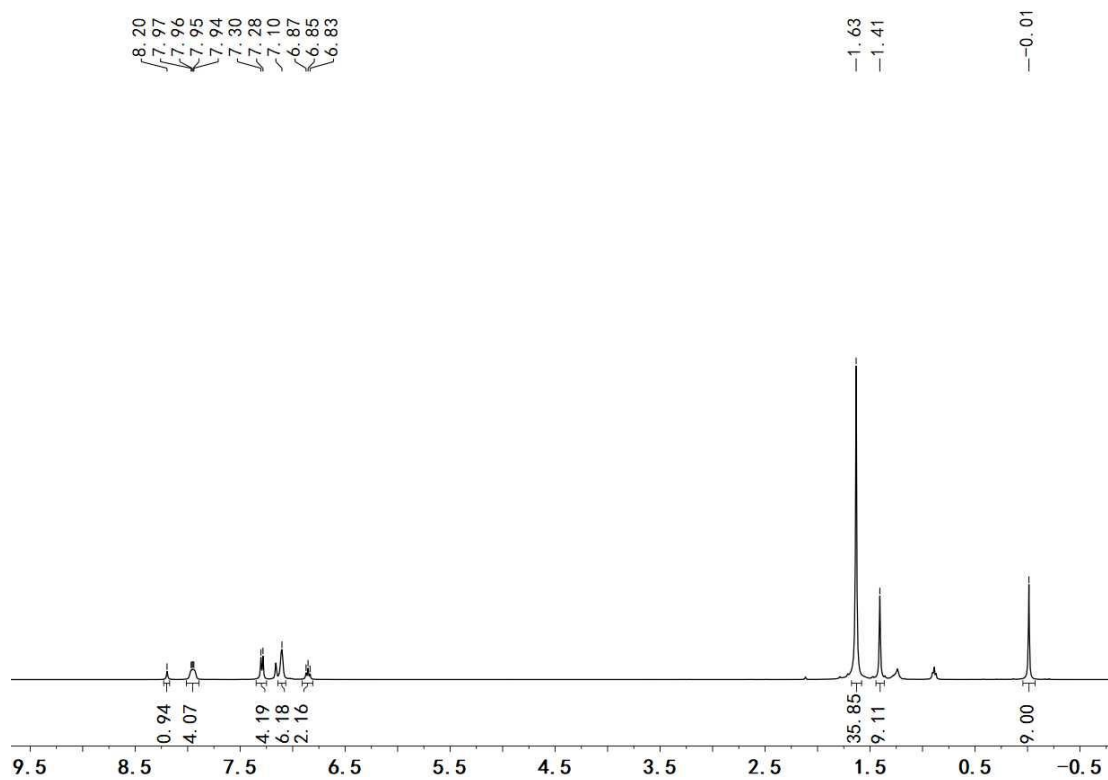

Fig. S17.  $^1\text{H}$  NMR (400 MHz,  $\text{C}_6\text{D}_6$ , 298 K).

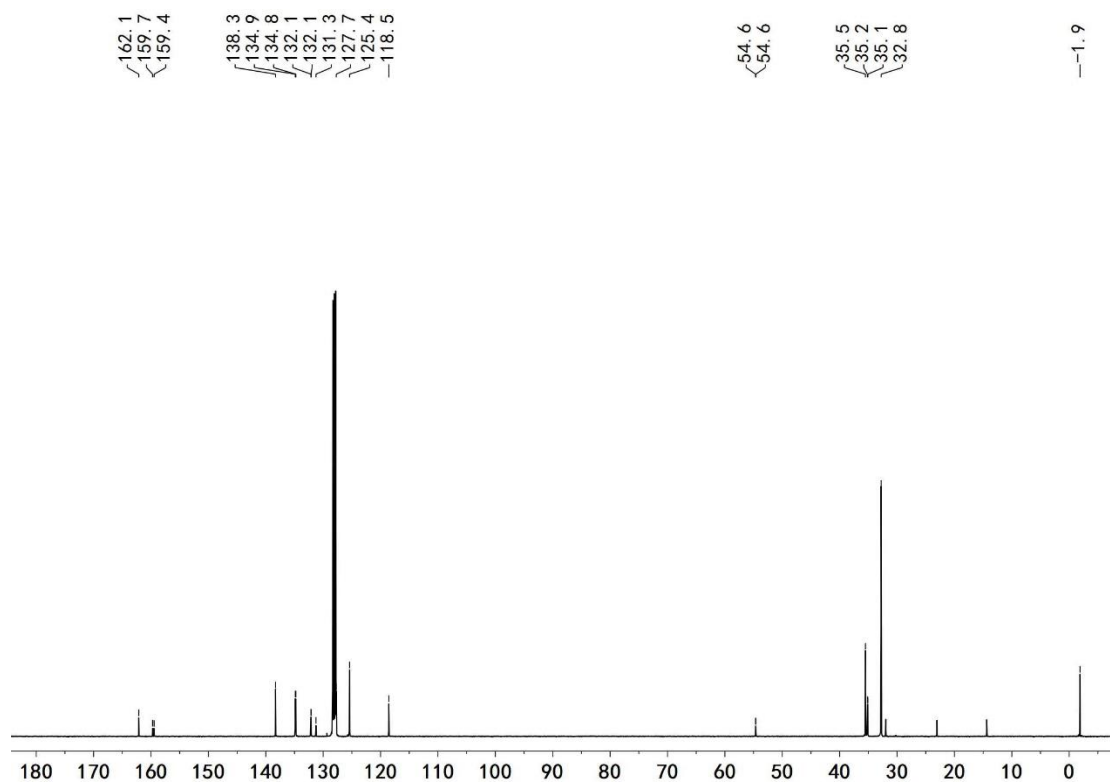

Fig. S18.  $^{13}\text{C}\{^1\text{H}\}$  NMR (101 MHz,  $\text{C}_6\text{D}_6$ , 298 K).

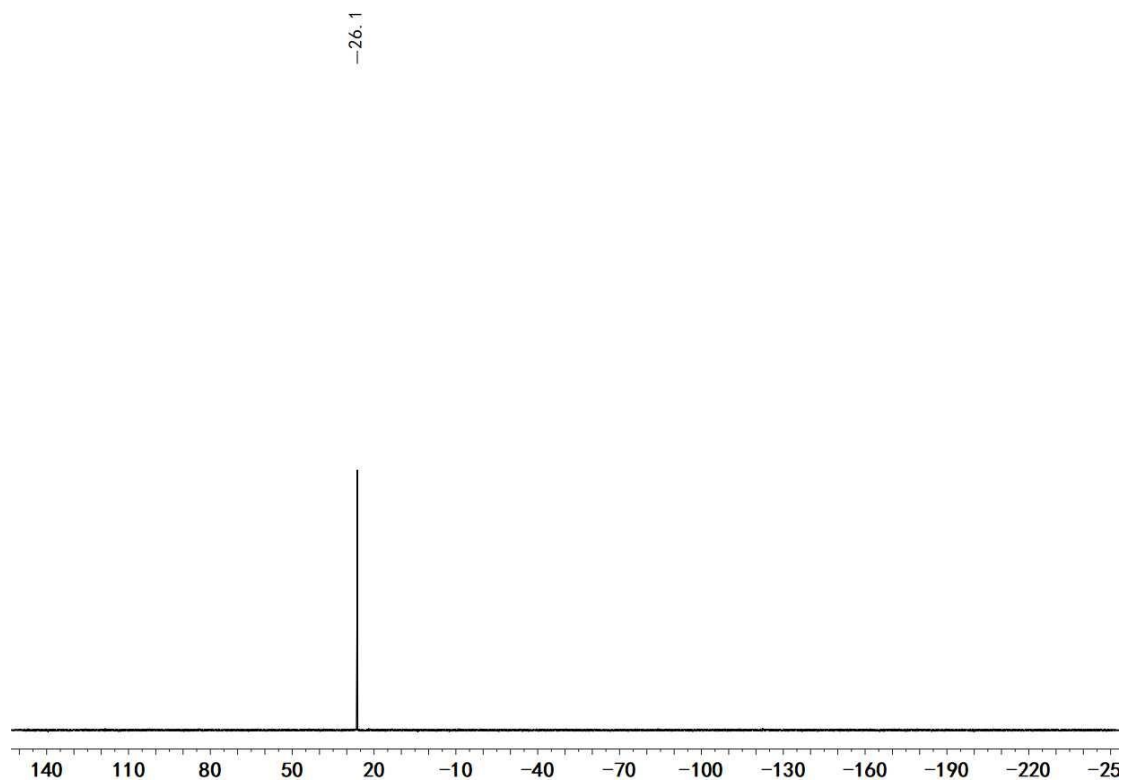

Fig. S19.  $^{31}\text{P}\{^1\text{H}\}$  NMR (162 MHz,  $\text{C}_6\text{D}_6$ , 298 K).

**X-ray crystal structure analysis of complex 6:** formula  $\text{C}_{48}\text{H}_{71}\text{N}_3\text{O}_2\text{PScSi}\cdot 0.5\text{C}_7\text{H}_8$ ,  $M = 872.16 \text{ gmol}^{-1}$ , colorless,  $0.17 \times 0.16 \times 0.15 \text{ mm}$ , triclinic, space group  $P\bar{1}$ ,  $a =$

11.2343(5),  $b = 11.7686(6)$ ,  $c = 21.1672(10)$  Å,  $\alpha = 78.026(2)^\circ$ ,  $\beta = 78.416(2)^\circ$ ,  $\gamma = 68.270(2)^\circ$ ,  $V = 2519.3(2)$  Å<sup>3</sup>,  $\rho_{calc} = 1.150$  gcm<sup>-3</sup>,  $\mu = 1.381$  mm<sup>-1</sup>, empirical absorption correction ( $0.6409 \leq T \leq 0.7506$ ,  $Z = 2$ ,  $\lambda = 1.34138$  Å,  $T = 120.0$  K, 85193 reflections collected ( $-13 \leq h \leq 13$ ,  $-14 \leq k \leq 14$ ,  $-25 \leq l \leq 25$ ), 9302 independent ( $R_{int} = 0.0881$ ) and 6625 observed reflections [ $I > 2\sigma(I)$ ], 588 refined parameters, the final  $R_1$  was 0.0490 [ $I > 2\sigma(I)$ ] and  $wR_2$  was 0.1287 (all data), max. (min.) residual electron density 0.33 (-0.41)  $e$  Å<sup>-3</sup>, hydrogen atoms were placed in calculated positions and refined using a riding model.

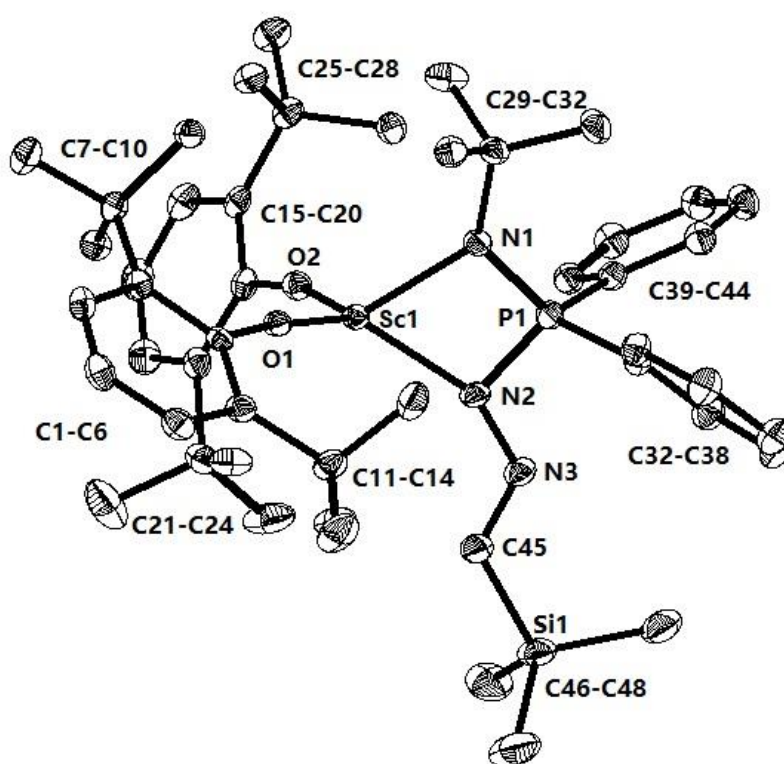

**Fig. S20.** Molecular structure of complex 6.



## Preparation of complex 7a

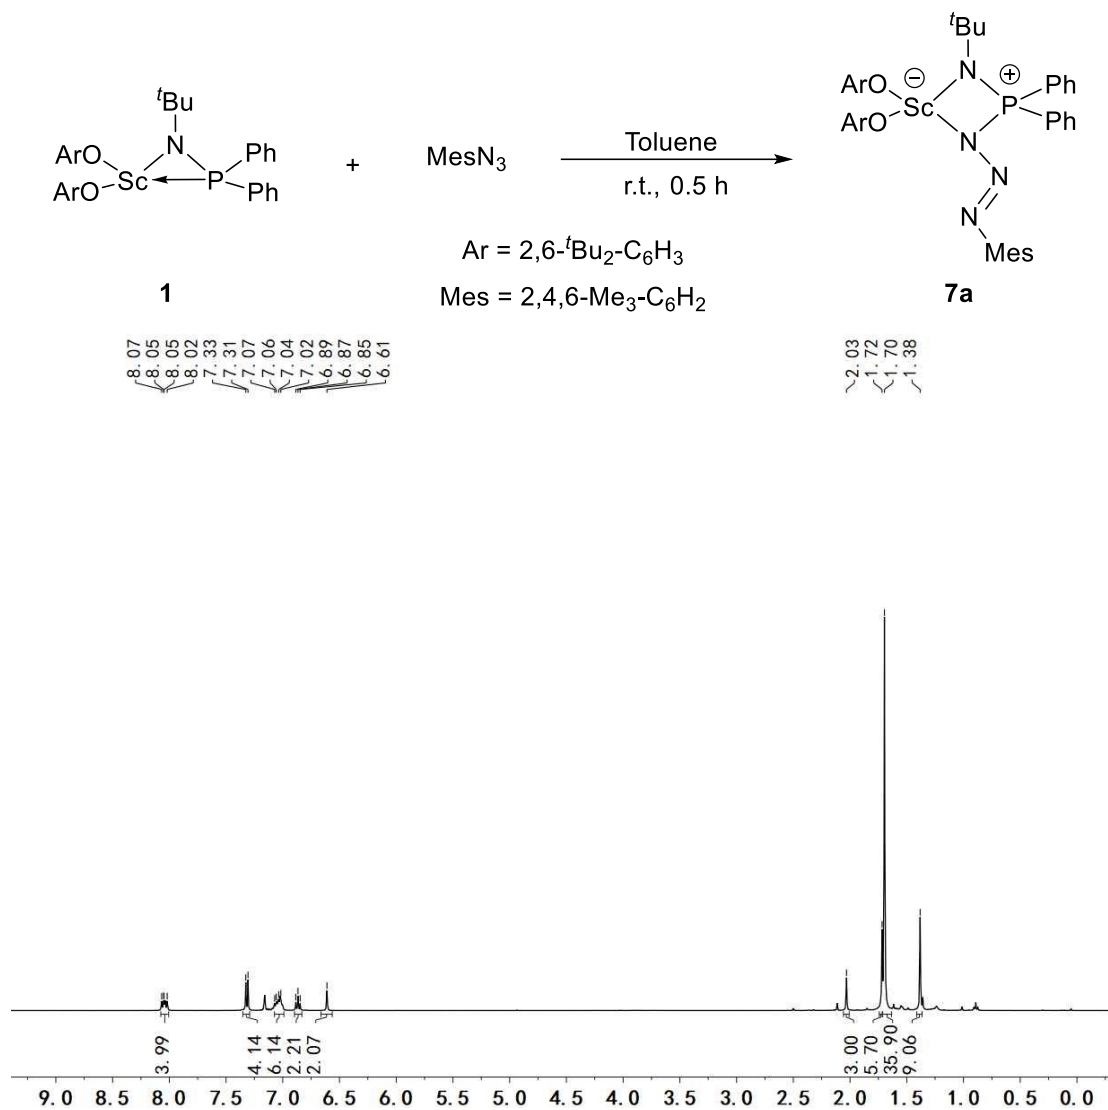

Fig. S21. <sup>1</sup>H NMR (400 MHz, C<sub>6</sub>D<sub>6</sub>, 298 K).

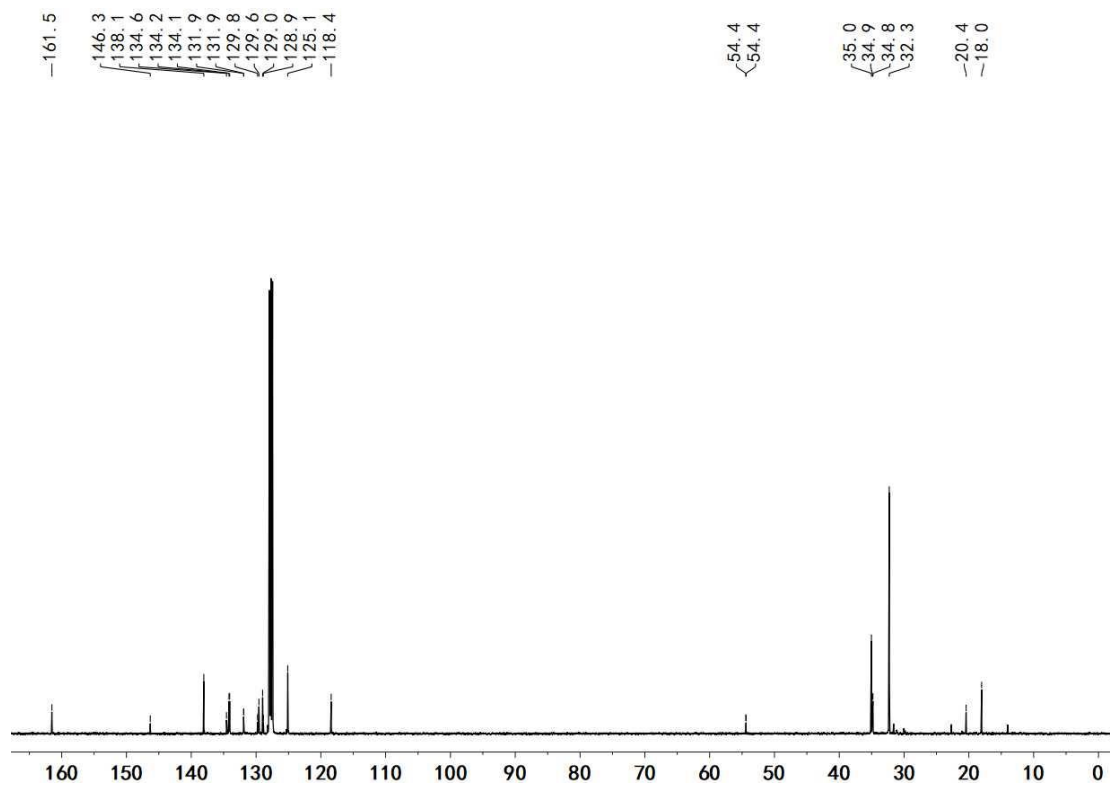

Fig. S22.  $^{13}\text{C}\{^1\text{H}\}$  NMR (101 MHz,  $\text{C}_6\text{D}_6$ , 298 K).

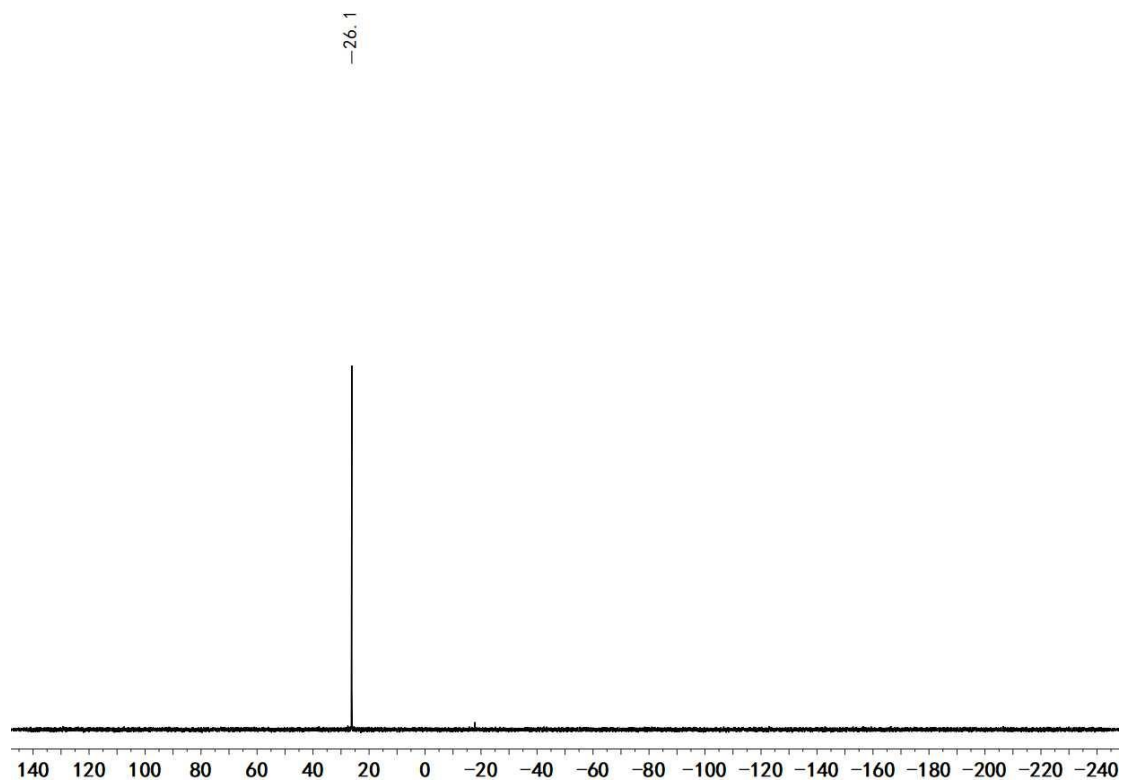

Fig. S23.  $^{31}\text{P}\{^1\text{H}\}$  NMR (162 MHz,  $\text{C}_6\text{D}_6$ , 298 K).

**X-ray crystal structure analysis of complex 7a:** formula  $\text{C}_{53}\text{H}_{72}\text{N}_4\text{O}_2\text{PSc}$ ,  $M = 873.07$   $\text{g mol}^{-1}$ , colorless,  $0.18 \times 0.16 \times 0.15$  mm, monoclinic, space group  $P2_1$ ,  $a = 10.1260(5)$ ,

$b = 22.6532(11)$ ,  $c = 21.7871(11)$  Å,  $\alpha = 90^\circ$ ,  $\beta = 101.164(2)^\circ$ ,  $\gamma = 90^\circ$ ,  $V = 4903.1(4)$  Å<sup>3</sup>,  $\rho_{calc} = 1.183$  gcm<sup>-3</sup>,  $\mu = 1.276$  mm<sup>-1</sup>, empirical absorption correction ( $0.6366 \leq T \leq 0.7506$ ),  $Z = 4$ ,  $\lambda = 1.34138$  Å,  $T = 120.0$  K, 127635 reflections collected ( $-12 \leq h \leq 12$ ,  $-27 \leq k \leq 27$ ,  $-26 \leq l \leq 26$ ), 18016 independent ( $R_{int} = 0.0900$ ) and 13778 observed reflections [ $I > 2\sigma(I)$ ], 1136 refined parameters, the final  $R_I$  was 0.0500 [ $I > 2\sigma(I)$ ] and  $wR_2$  was 0.1257 (all data), max. (min.) residual electron density 0.31 (-0.60) e Å<sup>-3</sup>, hydrogen atoms were placed in calculated positions and refined using a riding model.

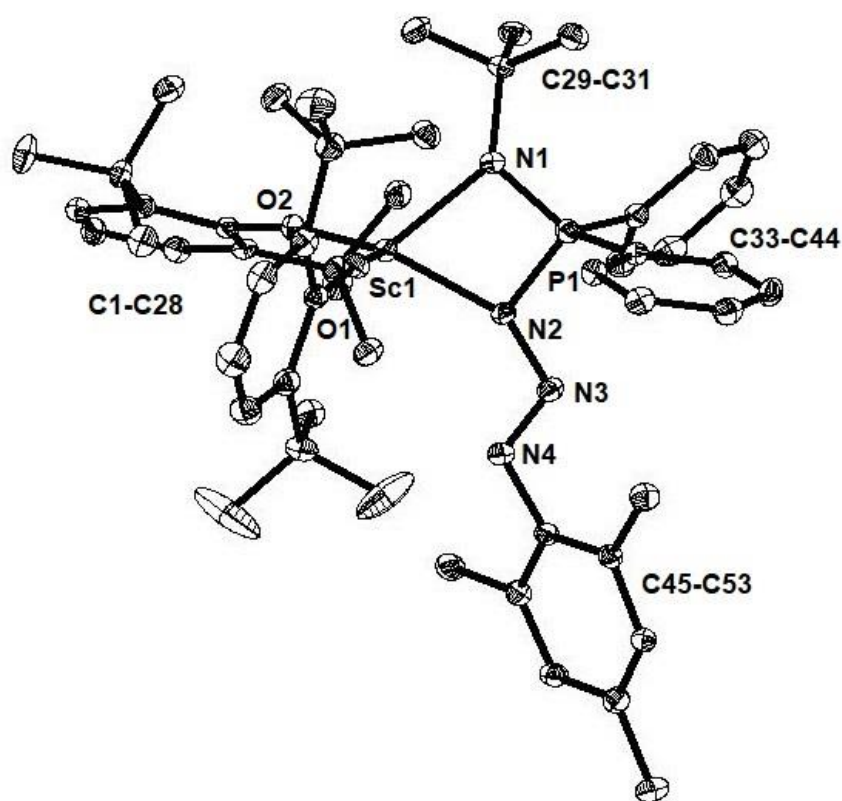

Fig. S24. Molecular structure of complex 7a.

## Preparation of complex 7b

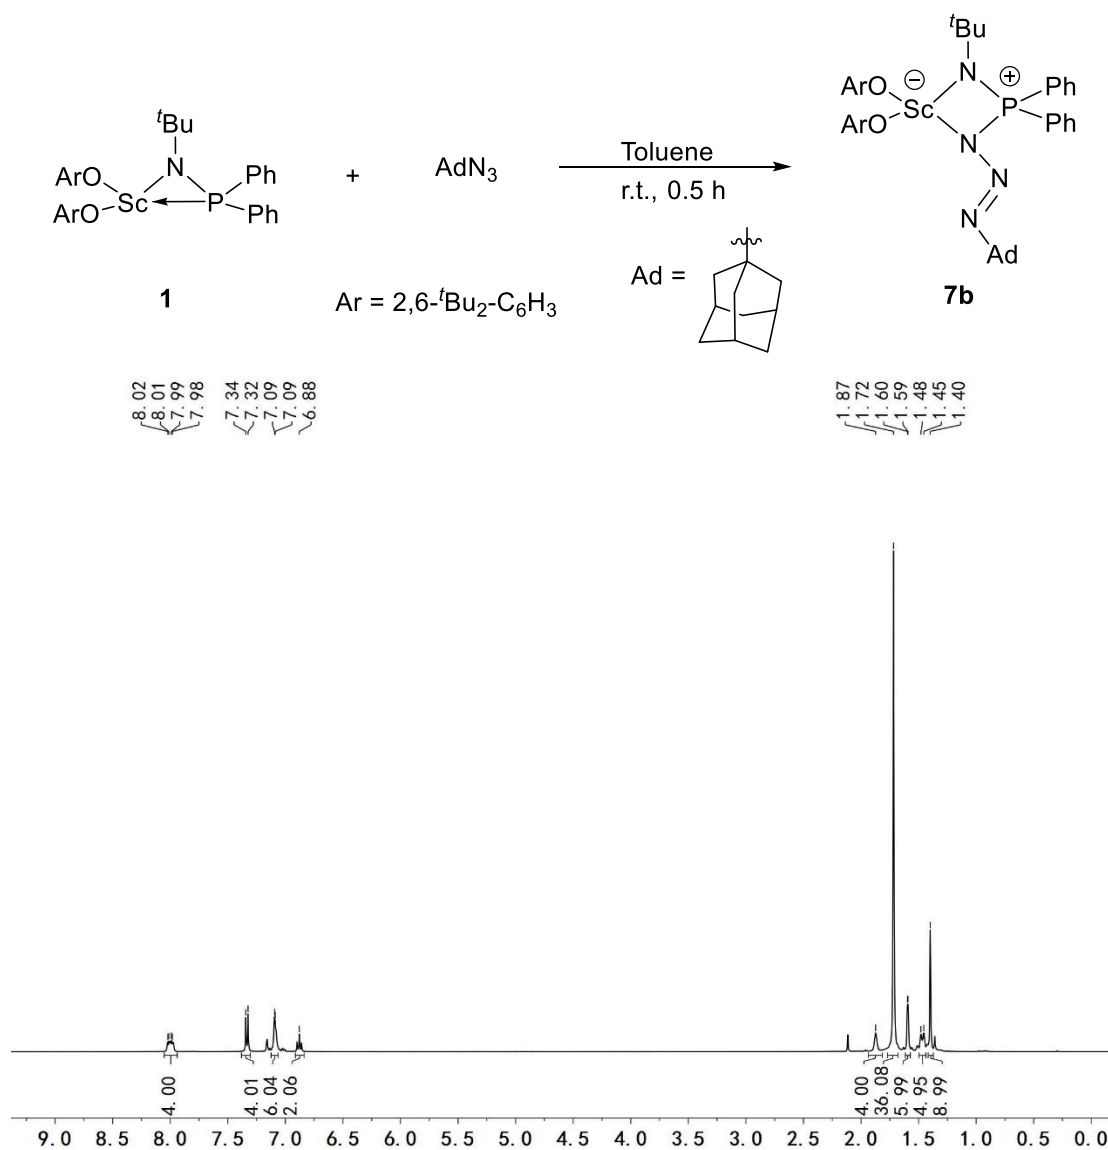

Fig. S25.  $^1\text{H NMR}$  (400 MHz,  $\text{C}_6\text{D}_6$ , 298 K).

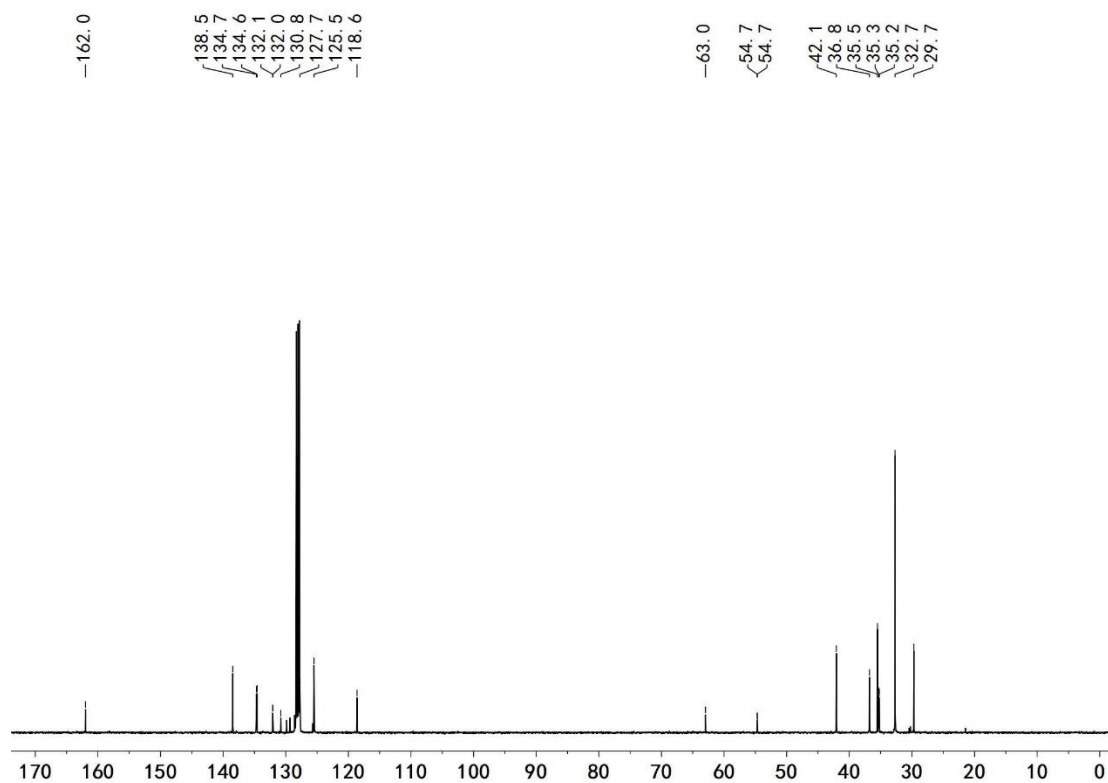

Fig. S26.  $^{13}\text{C}\{^1\text{H}\}$  NMR (101 MHz,  $\text{C}_6\text{D}_6$ , 298 K).

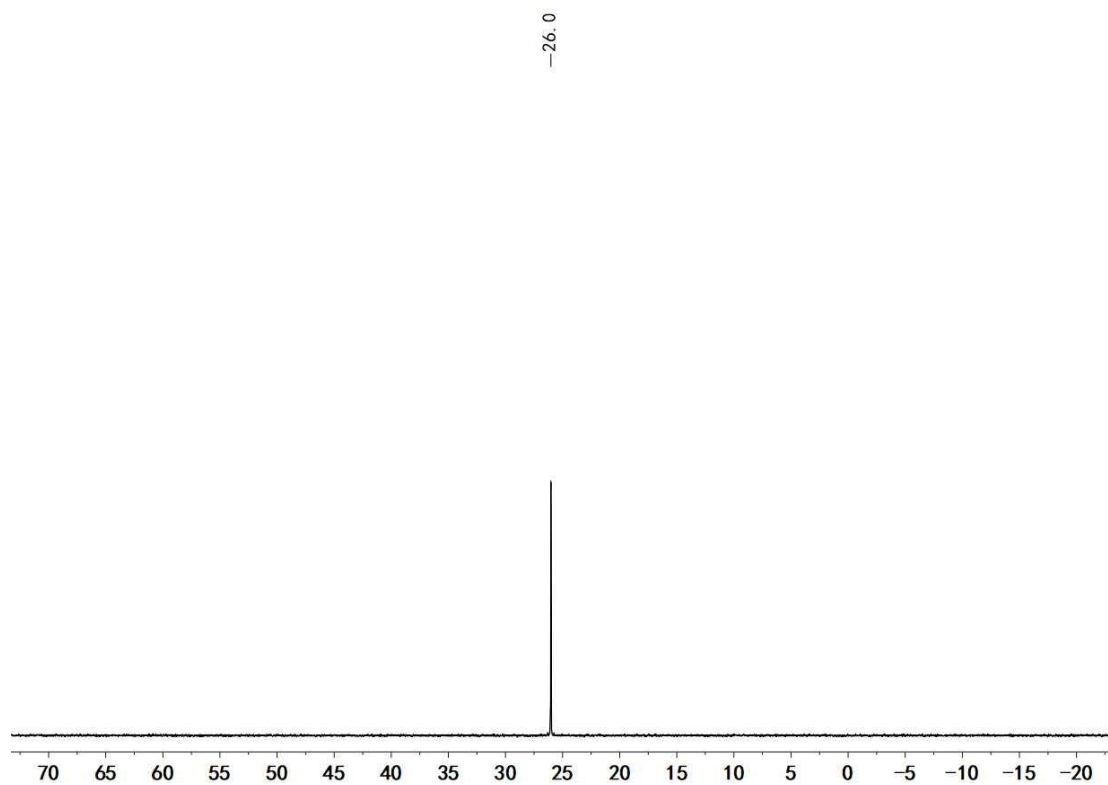

Fig. S27.  $^{31}\text{P}\{^1\text{H}\}$  NMR (162 MHz,  $\text{C}_6\text{D}_6$ , 298 K).

**X-ray crystal structure analysis of complex 7b:** formula  $\text{C}_{54}\text{H}_{76}\text{N}_4\text{O}_2\text{PSc}\cdot 0.5\text{C}_7\text{H}_8$ ,  $M = 935.18 \text{ gmol}^{-1}$ , colorless,  $0.16 \times 0.15 \times 0.14 \text{ mm}$ , triclinic, space group  $P\bar{1}$ ,  $a =$

11.2256(5),  $b = 12.2433(6)$ ,  $c = 22.3628(9)$  Å,  $\alpha = 92.103(2)^\circ$ ,  $\beta = 103.575(2)^\circ$ ,  $\gamma = 116.889(2)^\circ$ ,  $V = 2628.2(2)$  Å<sup>3</sup>,  $\rho_{calc} = 1.182$  gcm<sup>-3</sup>,  $\mu = 1.210$  mm<sup>-1</sup>, empirical absorption correction ( $0.6060 \leq T \leq 0.7506$ ),  $Z = 2$ ,  $\lambda = 1.34138$  Å,  $T = 120.0$  K, 51906 reflections collected ( $-13 \leq h \leq 13$ ,  $-14 \leq k \leq 14$ ,  $-26 \leq l \leq 26$ ), 9651 independent ( $R_{int} = 0.1029$ ) and 6064 observed reflections [ $I > 2\sigma(I)$ ], 639 refined parameters, the final  $R_I$  was 0.0648 [ $I > 2\sigma(I)$ ] and  $wR_2$  was 0.1736 (all data), max. (min.) residual electron density 0.47 (-0.58) e Å<sup>-3</sup>, hydrogen atoms were placed in calculated positions and refined using a riding model.

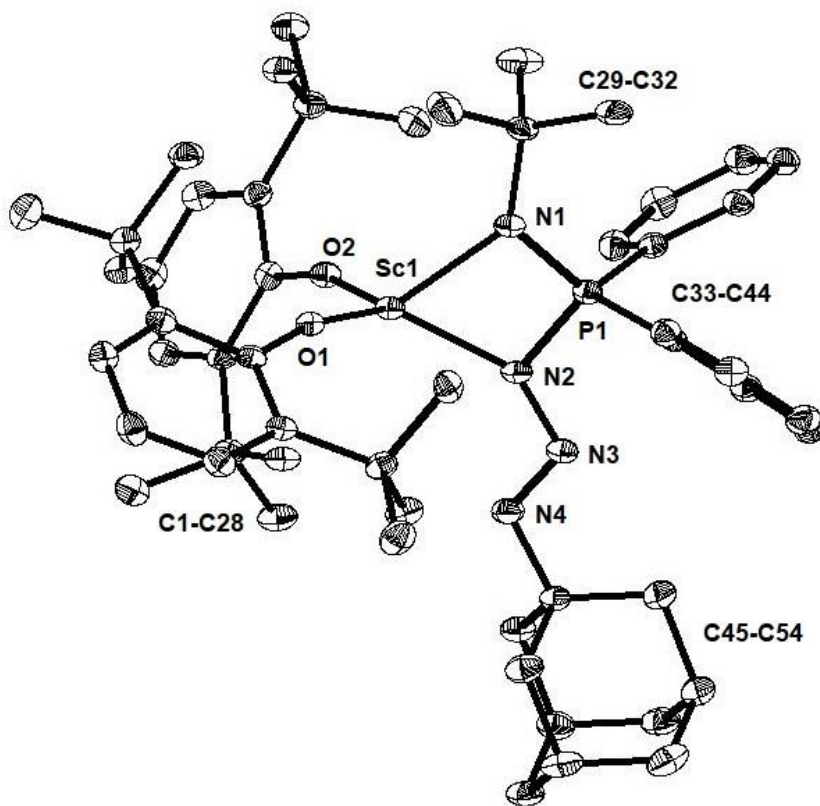

**Fig. S28.** Molecular structure of complex **7b**.

## Preparation of complex **8**

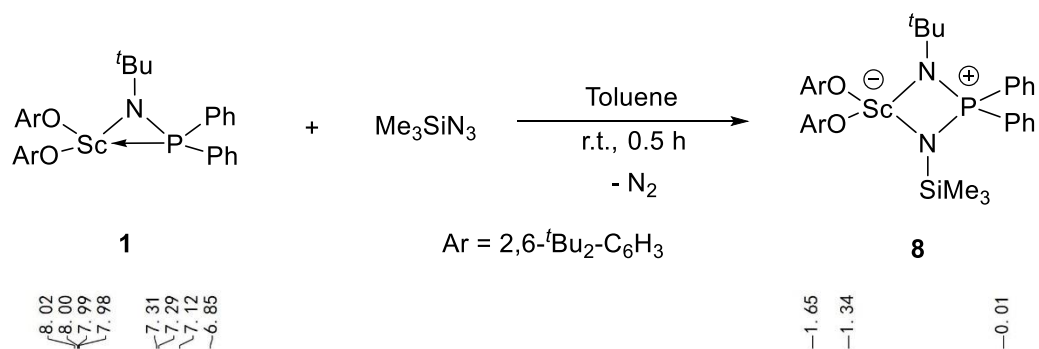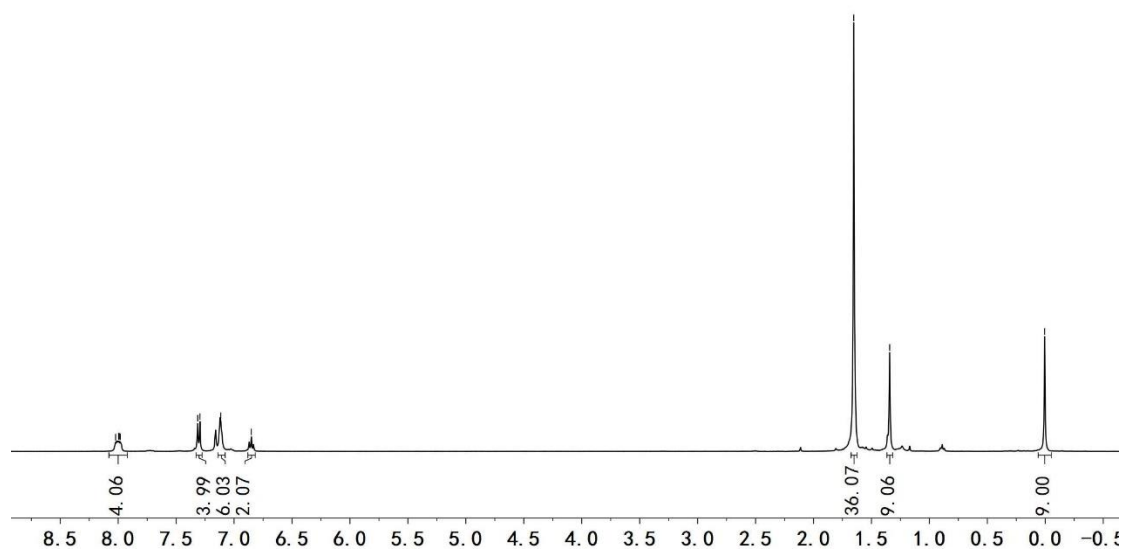

Fig. S29.  $^1\text{H}$  NMR (400 MHz,  $\text{C}_6\text{D}_6$ , 298 K).

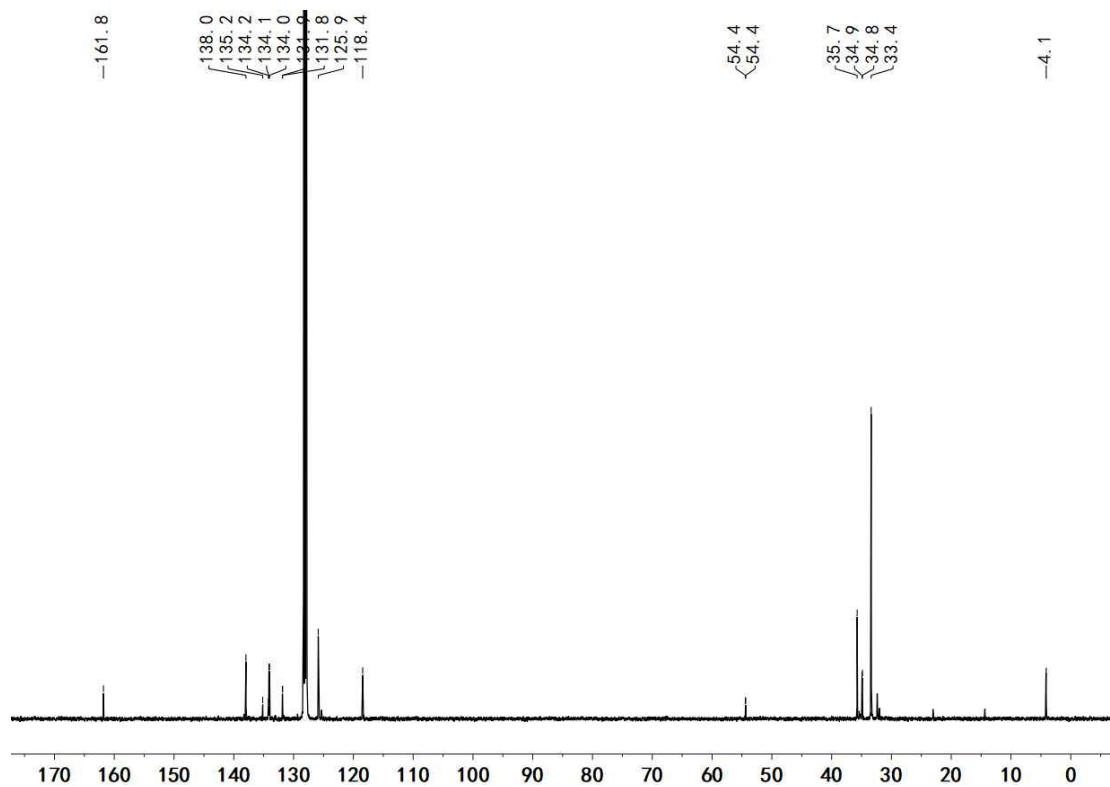

Fig. S30.  $^{13}\text{C}\{^1\text{H}\}$  NMR (101 MHz,  $\text{C}_6\text{D}_6$ , 298 K).

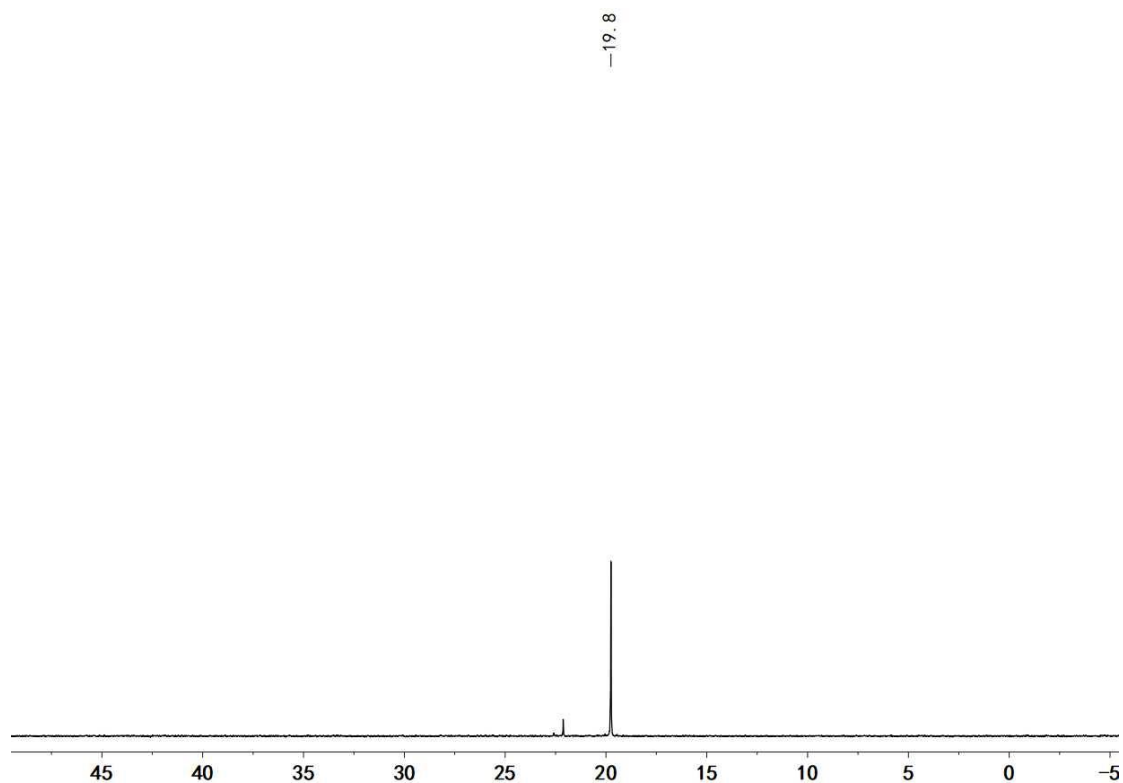

Fig. S31.  $^{31}\text{P}\{^1\text{H}\}$  NMR (162 MHz,  $\text{C}_6\text{D}_6$ , 298 K).

**X-ray crystal structure analysis of complex 8:** formula  $\text{C}_{47}\text{H}_{70}\text{N}_2\text{O}_2\text{PScSi}$ ,  $M = 799.07 \text{ gmol}^{-1}$ , colorless,  $0.18 \times 0.16 \times 0.15 \text{ mm}$ , monoclinic, space group  $C2/c$ ,  $a =$



41.237(4),  $b = 10.5045(10)$ ,  $c = 21.735(2)$  Å,  $\alpha = 90^\circ$ ,  $\beta = 102.852(4)^\circ$ ,  $\gamma = 90^\circ$ ,  $V = 9179.1(15)$  Å<sup>3</sup>,  $\rho_{calc} = 1.156$  gcm<sup>-3</sup>,  $\mu = 0.259$  mm<sup>-1</sup>, empirical absorption correction ( $0.6941 \leq T \leq 0.7455$ ),  $Z = 8$ ,  $\lambda = 0.71073$  Å,  $T = 153$  K, 66916 reflections collected ( $-53 \leq h \leq 53$ ,  $-13 \leq k \leq 12$ ,  $-28 \leq l \leq 28$ ), 10545 independent ( $R_{int} = 0.1396$ ) and 5811 observed reflections [ $I > 2\sigma(I)$ ], 505 refined parameters, the final  $R_1$  was 0.0627 [ $I > 2\sigma(I)$ ] and  $wR_2$  was 0.1349 (all data), max. (min.) residual electron density 0.54 (-0.42) e Å<sup>-3</sup>, hydrogen atoms were placed in calculated positions and refined using a riding model.

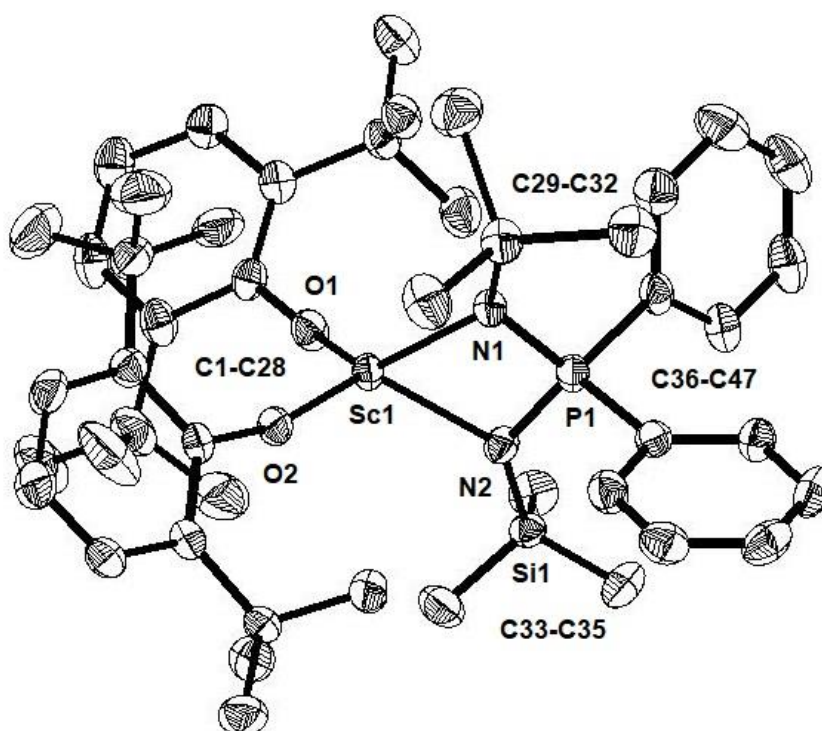

**Fig. S32.** Molecular structure of complex **8**.
